# Supplementary material
Source: ML conference proceedings conference paper supplement (https://openaccess.thecvf.com/content/ICCV_2017/html/Xu_R-C3D_Region_Convolutional_ICCV_2017_paper.html)
Supplement: Supplementary file 2 [file Xu_R-C3D_Region_Convolutional_ICCV_2017_supplemental.zip]

Archive with 4 entries (3 files):
- 2582-supp/
- 2582-supp/00_THUMOS14_vis.mp4
- 2582-supp/01_activitynet_vis.mp4
- 2582-supp/2582_Supp.pdf
